# Supplementary material
Source: HighWire-hosted journal article supplement (https://bmjopen.bmj.com/content/12/1/e054011)
Supplement: inline-supplementary-material-1 [file inline-supplementary-material-1.pdf]

| <b>Table S1: SCAs gene and primer.</b>                                                                    |         |                                                                                     |
|-----------------------------------------------------------------------------------------------------------|---------|-------------------------------------------------------------------------------------|
| SCA type                                                                                                  | Gene    | Primer (5' to 3')                                                                   |
| SCA1                                                                                                      | ATAXIN1 | Primer-F: CAACATGGGCAGTCTGAG<br>Primer-R: AACTGGAAATGTGGACGTA                       |
| SCA2                                                                                                      | ATAXIN2 | Primer-F: GGGCCCCTCACCATGTCTG<br>Primer-R: CGGGCTTGCGGACATTGG                       |
| SCA3                                                                                                      | ATAXIN3 | Primer-F: CCAGTGACTACTTTGATTC<br>Primer-R: CTTACCTAGATCACTCCCAA                     |
| SCA6                                                                                                      | CACNA1A | Primer-F: CACGTGTCCTATTCCCCTGTGATCC<br>Primer-R: TGGGTACCTCCGAGGGCCGCTGGTG          |
| SCA7                                                                                                      | ATXN7   | Primer-F: TGTTACATTGTAGGAGCGGAA<br>Primer-R: CACGACTGTCCCAGCATCACTT                 |
| SCA8                                                                                                      | ATXN8   | Primer-F: TTTGAGAAAGGCTTGTGAGGACTGAGAATG<br>Primer-R: GGTCCCTCATGTTAGAAAACCTGGCT    |
| SCA10                                                                                                     | ATXN10  | Primer-F: AGAAAACAGATGGCAGAATGA<br>Primer-R: GCCTGGGCAACATAGAGAGA                   |
| SCA12                                                                                                     | PPP2R2B | Primer-F: TGCTGGGAAAGAGTCGTG<br>Primer-R: CAGCGCACTCACCTCAC                         |
| SCA17                                                                                                     | TBP     | Primer-F: ATGCCTTATGGCACTGGACTG<br>Primer-R: CTGCTGGGACGTTGACTGCTG                  |
| DRPLA                                                                                                     | ATN1    | Primer-F: CCACCACCTCCTCCCTATG<br>Primer-R: AGTGGGTGGGGAAATGCT                       |
| FRDA                                                                                                      | FXN     | Primer-F: GGGATTGGTTGCCAGTGCTTAAAAGTTAG<br>Primer-R: GATCTAAGGACCATCATGGCCACACTTGCC |
| Note: SCA= Spinocerebellar Ataxia. DRPLA= Dentatorubral-Pallidoluysian atrophy; FRDA=Friedreich's ataxia. |         |                                                                                     |
